# Supplementary material for: Metalloendopeptidase ADAM-like Decysin 1 (ADAMDEC1) in Colonic Subepithelial PDGFRα+ Cells Is a New Marker for Inflammatory Bowel Disease
Source: MDPI journal article supplement (doi:10.3390/ijms23095007), 2022-04-30
Supplement: s1 [file s1]

**Supplementary Figure S1.** Pathological development of colitis in DSS-induced mice. **(a)** A study design of DSS-induced colitis and recovery mice. **(b)** DSS-treated mice after 6 days (DSS 6D) and 8 days (DSS 8D) showing rectal bleeding in a dotted circle compared to non-treated control mice (NC) and recovery mice for 7 days post DSS treatment (Rec 7D). Colon with cecum was dissected from each group to confirm rectal bleeding (arrows). **(c)** Body weight changes. **(d, e)** Stool and bleeding scores in DSS 6D, 8D, and Rec 7D mice, compared to NC. **(f)** Length of colon in DSS 6D, 8D, and Rec 7D mice, compared to NC. **(g)** H&E staining of colon. **(h)** Mucosal fold length of colon. **(i)** Expression of IL-6 in whole blood and colon in DSS 6D, DSS 8D and Rec 7D compared to NC by ELISA. ( $n=7-10$ ).  $*p < 0.05$  and  $**p < 0.01$ , versus NC.

**Supplementary Figure S2.** PDGFR $\alpha^+$  cells identified by flow cytometry in DSS induced colitis mice. **(a)** PDGFR $\alpha^+$  (*Pdgfra-eGFP* $^+$ ) populations (P1 and P2) in CD45 $^-$  and CD45 $^+$  cells identified by flow cytometry at 6 days post DSS treatment (DSS 6D) and control colonic mucosa. **(b)** Macrophage (CD14 $^+64^+$ ) population in CD45 $^+$  and CD45 $^-$  cells identified by flow cytometry at DSS 6D.

**Supplementary Table S1.** Assessment of disease activity index (DAI)

**Supplementary Table S2.** Clinical information of human samples used in this study

**Supplementary Table S3.** Oligonucleotides used in this study

**Supplementary Table S4.** Antibodies used in this study
