# Supplementary material for: Metalloendopeptidase ADAM-like Decysin 1 (ADAMDEC1) in Colonic Subepithelial PDGFRα+ Cells Is a New Marker for Inflammatory Bowel Disease
Source: Int J Mol Sci. 2022 Apr 30;23(9):5007. doi: 10.3390/ijms23095007 (PMC9103908; doi:10.3390/ijms23095007)
Supplement: Supplementary file 1 [file ijms-23-05007-s001.zip]

Archive with 7 entries (7 files):
- Suplementary Figure and Tables legends.pdf
- Supplementary Figure S1.tif
- Supplementary Figure S2.tif
- Supplementary Table 1.xlsx
- Supplementary Table 2.xlsx
- Supplementary Table 3.xlsx
- Supplementary Table 4.xlsx
