# Supplementary material for: Metalloendopeptidase ADAM-like Decysin 1 (ADAMDEC1) in Colonic Subepithelial PDGFRα+ Cells Is a New Marker for Inflammatory Bowel Disease
Source: Int J Mol Sci. 2022 Apr 30;23(9):5007. doi: 10.3390/ijms23095007 (PMC9103908; doi:10.3390/ijms23095007)
Supplement: Supplementary file 1 [file ijms-23-05007-s001.zip › Supplementary Table 1.xlsx]

## Sheet: Sheet1
Supplementary Table 1. Assessment of disease activity index (DAI)
Name	Score	Characteristics
Rectal bleeding	0	No bleeding
Rectal bleeding	1	-
Rectal bleeding	2	Slightly bleeding
Rectal bleeding	3	-
Rectal bleeding	4	Gross bleeding
Blood in stool	0	No blood
Blood in stool	2	Presence of blood assessed by Hemoccult test
Blood in stool	4	Visible blooding
Stool consistency	0	Normal feces
Stool consistency	1	Loose stool, watery diarrchea
Stool consistency	2	Slimy diarrchea, little blood
Stool consistency	3	Severe watery diarrchea with blood
