# Supplementary material for: Metalloendopeptidase ADAM-like Decysin 1 (ADAMDEC1) in Colonic Subepithelial PDGFRα+ Cells Is a New Marker for Inflammatory Bowel Disease
Source: Int J Mol Sci. 2022 Apr 30;23(9):5007. doi: 10.3390/ijms23095007 (PMC9103908; doi:10.3390/ijms23095007)
Supplement: Supplementary file 1 [file ijms-23-05007-s001.zip › Supplementary Table 2.xlsx]

## Sheet: Sheet1
Supplementary Table 2. Clinical information of human samples used in this study
Subject	Disease	Age	Gender	Location	Behavior	A1C (%)	Glucose	GES % 2hr	GES % 4hr
Healthy 01	Healthy	34	M	n/a	n/a	-	-	-	-
Healthy 02	Healthy	41	M	n/a	n/a	-	-	-	-
Healthy 03	Healthy	47	M	n/a	n/a	-	-	-	-
Healthy 04	Healthy	24	F	n/a	n/a	-	-	-	-
Healthy 05	Healthy	27	F	n/a	n/a	-	-	-	-
Ileitis 01	Crohn’s disease	22	F	ileal	stricturing and fistulizing	-	-	-	-
Ileitis 02	Crohn’s disease	49	F	ileal	inflammatory	-	-	-	-
Ileitis 03	Crohn’s disease	28	M	ileal	fistulizing	-	-	-	-
Ileitis 04	Crohn’s disease	23	F	ileal	stricturing	-	-	-	-
Ileitis 05	Crohn’s disease	41	F	ileal	stricturing	-	-	-	-
Ileocolitis 01	Crohn’s disease	29	M	ileocolonic	inflammatory	-	-	-	-
Ileocolitis 02	Crohn’s disease	35	F	ileocolonic	stricturing and fistulizing	-	-	-	-
Ileocolitis 03	Crohn’s disease	25	F	ileocolonic	fistulizing	-	-	-	-
Ileocolitis 04	Crohn’s disease	63	M	ileocolonic	fistulizing	-	-	-	-
Ileocolitis 05	Crohn’s disease	31	M	ileocolonic	stricturing	-	-	-	-
Colitis 01	Crohn’s disease	24	M	colonic	fistulizing	-	-	-	-
Colitis 02	Crohn’s disease	31	M	colonic	inflammatory	-	-	-	-
Colitis 03	Crohn’s disease	48	F	colonic	fistulizing	-	-	-	-
Colitis 04	Crohn’s disease	32	F	colonic	fistulizing	-	-	-	-
Colitis 05	Crohn’s disease	56	F	colonic	unknown	-	-	-	-
Left-sided 01	Ulcerative colitis	41	M	left-sided	n/a	-	-	-	-
Left-sided 02	Ulcerative colitis	44	M	left-sided	n/a	-	-	-	-
Left-sided 03	Ulcerative colitis	35	M	left-sided	n/a	-	-	-	-
Left-sided 04	Ulcerative colitis	47	F	left-sided	n/a	-	-	-	-
Left-sided 05	Ulcerative colitis	35	M	left-sided	n/a	-	-	-	-
Pan 01	Ulcerative colitis	37	F	pan-colitis	n/a	-	-	-	-
Pan 02	Ulcerative colitis	60	M	pan-colitis	n/a	-	-	-	-
Pan 03	Ulcerative colitis	25	F	pan-colitis	n/a	-	-	-	-
Pan 04	Ulcerative colitis	60	F	pan-colitis	n/a	-	-	-	-
Pan 05	Ulcerative colitis	26	M	pan-colitis	n/a	-	-	-	-
IG 01	Idiopathic gastroparesis	34	M	n/a	n/a	5	91	0.72	0.4
IG 02	Idiopathic gastroparesis	50	F	n/a	n/a	5.4	91	0.58	0.27
IG 03	Idiopathic gastroparesis	26	F	n/a	n/a	5	88	0.49	0.18
IG 04	Idiopathic gastroparesis	23	F	n/a	n/a	5.3	96	0.7016	0.0867
IG 05	Idiopathic gastroparesis	27	M	n/a	n/a	5	-	0.29	0.13
DG 01	Diabetes gastropheresis	47	M	n/a	n/a	6.2	-	0.1	0.01
DG 02	Diabetes gastropheresis	56	F	n/a	n/a	8.6	-	0.44	0.11
DG 03	Diabetes gastropheresis	30	F	n/a	n/a	8.2	-	0.65	0.33
