# Supplementary material for: Metalloendopeptidase ADAM-like Decysin 1 (ADAMDEC1) in Colonic Subepithelial PDGFRα+ Cells Is a New Marker for Inflammatory Bowel Disease
Source: Int J Mol Sci. 2022 Apr 30;23(9):5007. doi: 10.3390/ijms23095007 (PMC9103908; doi:10.3390/ijms23095007)
Supplement: Supplementary file 1 [file ijms-23-05007-s001.zip › Supplementary Table 3.xlsx]

## Sheet: Sheet1
Supplementary Table 3. Oligonucleotides used in this study
Name	Sequence (5' to 3')	Orientation	Product (bp)	Reactivity
Adam1-1	CTCACCCAGAGGAGAAGAGAGC	Forward	118	Mouse
Adam1-1r	CAACCCATCACAGGTACTGATCC	Reverse		Mouse
Adam1-2	GGATCAGTACCTGTGATGGGTTG	Forward	135	Mouse
Adam1-2r	GAACTGTGTCTTGTCCCTTCCAG	Reverse		Mouse
Adam1-3	CAAGTCCTGGATGTGGGAGAAG	Forward	113	Mouse
Adam1-3r	GCTTCACTGCAGTCAGGTTGAG	Reverse		Mouse
cd45	GGCCTGAGCCTGTATCTAAAC	Forward	198	Mouse
cd45-r	CAGTCCCATTTCTTTGAATCTTC	Reverse		Mouse
cd64	TCGAAGCTCAGTGGGTGACT	Forward	172	Mouse
cd64-r	GATTACCCAGCTTGTCTCAG	Reverse		Mouse
Gapdh	GTATTCACCACCATGGAGAAG	Forward	197	Mouse
Gapdh-r	GCTAAGCAGTTGGTGGTGCAG	Reverse		Mouse
Adam1-1	GTTGCCAGCATCAGTACTTGTGAC	Forward	144	Human
Adam1-1r	GTTAGCTGGGTCTTGTTCCTCCTG	Reverse		Human
Adam1-2	GTCCTTGGTATGCCTGATGTTCC	Forward	159	Human
Adam1-2r	CAGCAGGCACTTTGGTTTCTGAG	Reverse		Human
Gapdh	CCACATCGCTCAGACACCATG	Forward	135	Human
Gapdh-r	GTCAATGAAGGGGTCATTGATGGC	Reverse		Human
