# Supplementary material for: Metalloendopeptidase ADAM-like Decysin 1 (ADAMDEC1) in Colonic Subepithelial PDGFRα+ Cells Is a New Marker for Inflammatory Bowel Disease
Source: Int J Mol Sci. 2022 Apr 30;23(9):5007. doi: 10.3390/ijms23095007 (PMC9103908; doi:10.3390/ijms23095007)
Supplement: Supplementary file 1 [file ijms-23-05007-s001.zip › Supplementary Table 4.xlsx]

## Sheet: Sheet1
Supplementary Table 4. Antibodies used in this study
Antibody	Supplier (Catalog #)	Reactivity	Host	Clonality	MW	Dilution
PDGFRA	R&D System (AF1062)	Mouse	Goat	Polyclonal	125	1:500 WB; 1:100 IHC
ADAMDEC1	Abcam (ab67754)	Human, Mouse	Rabbit	Polyclonal	53	1:100 WB; 1:50 IHC
ADAMDEC1	Antibodies-online (ABIN2828180)	Human, Mouse	Rabbit	Polyclonal		1:20 IHC
CD45	Proteintech (24552-1-AP)	Human, Mouse	Rabbit	Polyclonal	180-220	1:200 IHC
CD64	ThermoFisher (MA5-29706)	Mouse	Rabbit	Monoclonal		1:200 IHC
hCD64	Antibodies-online (ABIN1497349)	Human	Mouse	Monoclonal		1:200 IHC
GAPDH	Proteintech (10494-1-AP)	Human, Mouse	Rabbit	Polyclonal	36	1:2000 WB
HRP-linked anti-rabbit	Cell signaling (7074)	Goat	Rabbit	Polyclonal	NA	1:500 IHC
HRP-linked anti-goat	Abcam (ab6741)	Rabbit	Goat	Polyclonal	NA	1:500 IHC
AlexaTM 594-anti-rabbit	Jackson ImmunoResearch (711-585-152)	Rabbit	Donkey	Polyclonal	NA	1:500 IHC
AlexaTM 594-anti-rat	Jackson ImmunoResearch (712-585-153)	Rat	Donkey	Polyclonal	NA	1:500 IHC
AlexaTM 488-anti-goat	ThermoFisher (A-11055)	Goat	Donkey	Polyclonal	NA	1:500 IHC
